# Supplementary material
Source: PubMed Central journal article supplement (PMC3835628)
Supplement: NIHMS523315-supplement-Supplementary_Materials.pdf [file NIHMS523315-supplement-Supplementary_Materials.pdf]

## Supplementary Material

DirkJan Hijnen<sup>1</sup>,  
Edward F. Knol<sup>1</sup>,  
Yoony Y. Gent<sup>1</sup>,  
Barbara Giovanonne<sup>1</sup>,  
Scott Beijn<sup>1</sup>,  
Thomas S. Kupper<sup>2</sup>,  
Carla A.F.M. Bruijnzeel-Koomen<sup>1</sup>,  
Rachael A. Clark<sup>2</sup>

<sup>1</sup>Department of Dermatology, University Medical Center Utrecht, Utrecht, The Netherlands

<sup>2</sup>Department of Dermatology, Brigham and Women's Hospital and the Harvard Skin Disease Research Center, Boston, MA

Correspondence: DirkJan Hijnen, Department of Dermatology, University Medical Center Utrecht, 3584 CX Utrecht, Room G02.124, The Netherlands, phone: +31 88 7557388, fax: +31 88 755404, e-mail: [dirkjanhijnen@gmail.com](mailto:dirkjanhijnen@gmail.com)

## Supplementary data S1

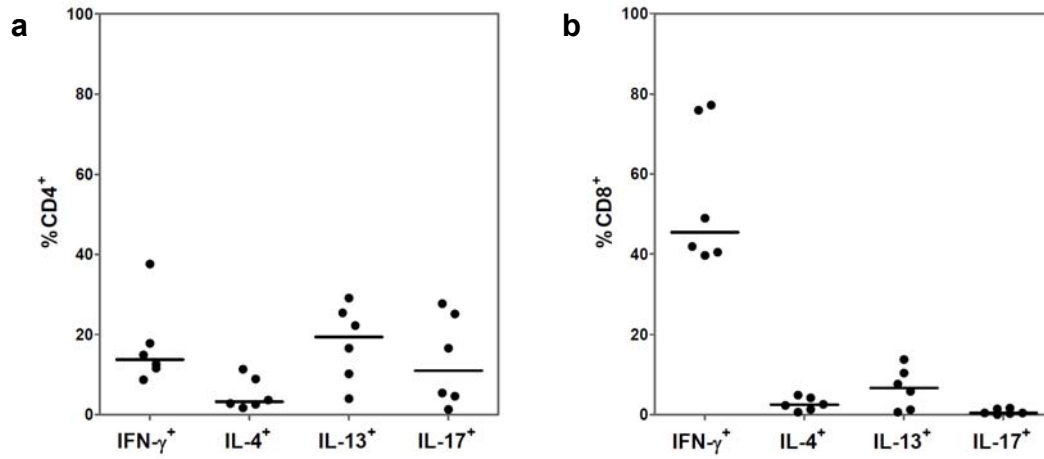

**Figure S1. Cytokine expression profiles of T cells isolated from normal skin biopsies (n=6).** T cells were isolated from healthy human skin samples. Percentages of cytokine expressing T cells are shown for (a) CD4<sup>+</sup> T cells and (b) CD8<sup>+</sup> T cells

## Supplementary data S2

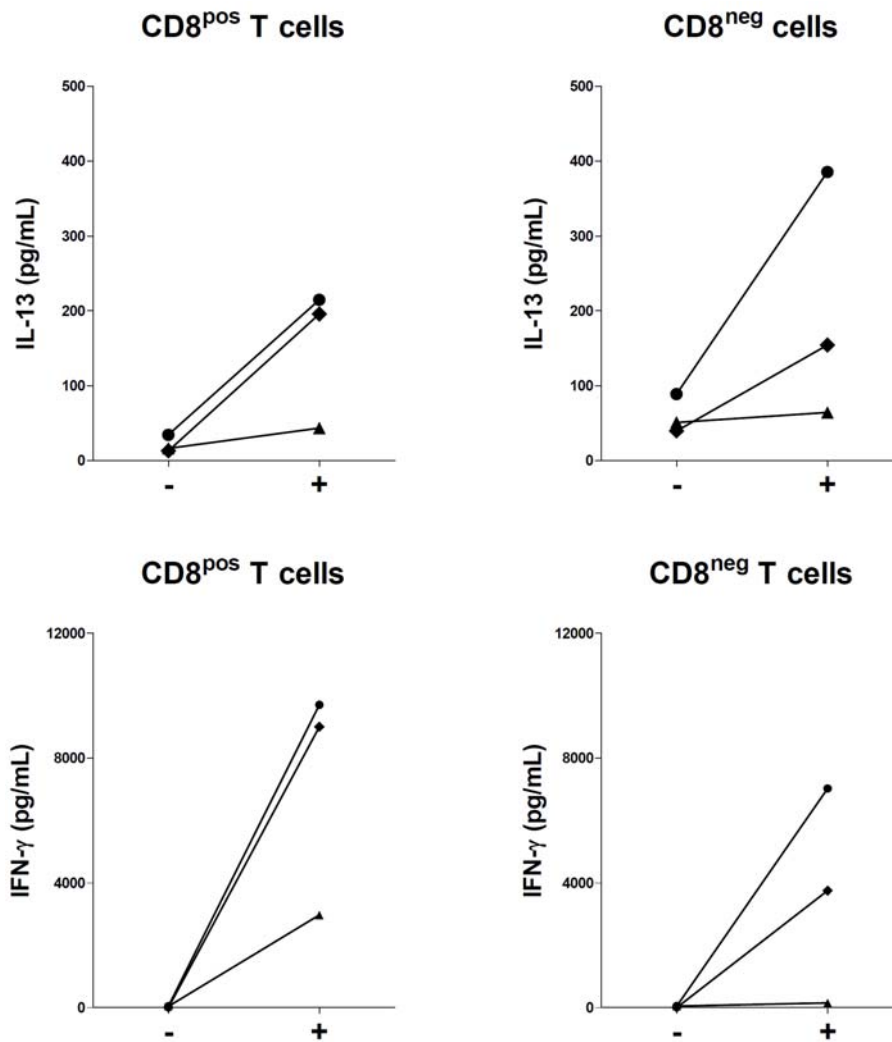

**Figure S2.** CD8<sup>+</sup> T cells isolated from skin biopsies secrete IL-13 (upper left panel) and IFN- $\gamma$  (lower left panel) as determined by ELISA. The CD8<sup>-</sup> T cell population (mainly including CD4<sup>+</sup> T cells, right panels) produces amounts of IL-13 and IFN- $\gamma$  comparable to the CD8<sup>+</sup> population.

## Supplementary data S3

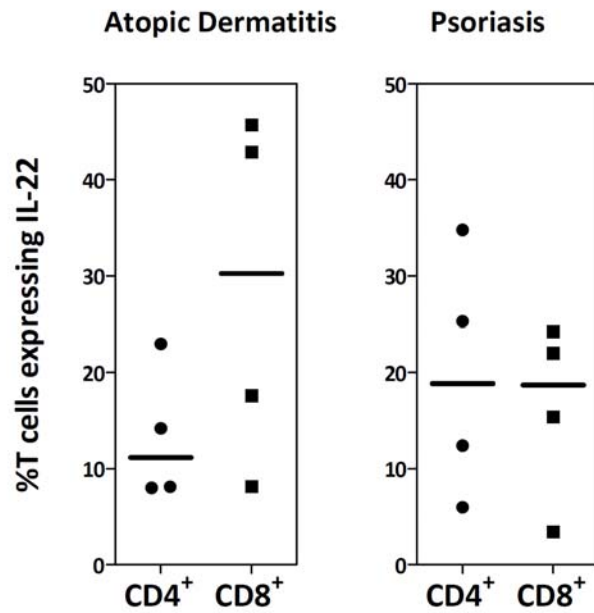

**Figure S3.** High numbers of CD4<sup>+</sup> and CD8<sup>+</sup> T cells isolated from AD (n=4) and psoriasis (n=4) produced IL-22. Horizontal bars represent median percentages for each group

## Supplementary data S4

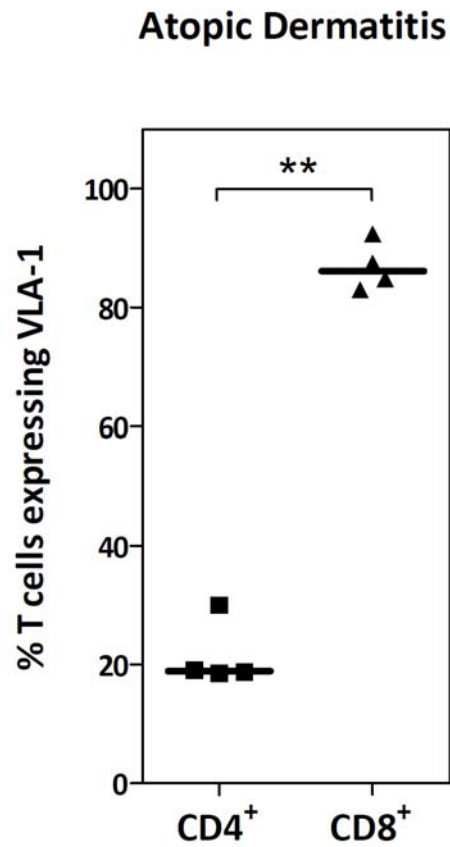

**Figure S4.** CD8<sup>+</sup> T cells from AD patients (n=4) show significantly higher expression levels of VLA-1 compared to CD4<sup>+</sup> T cells. Horizontal bars represent median percentages for each group. \*\* P<0.01

## Supplementary data S5

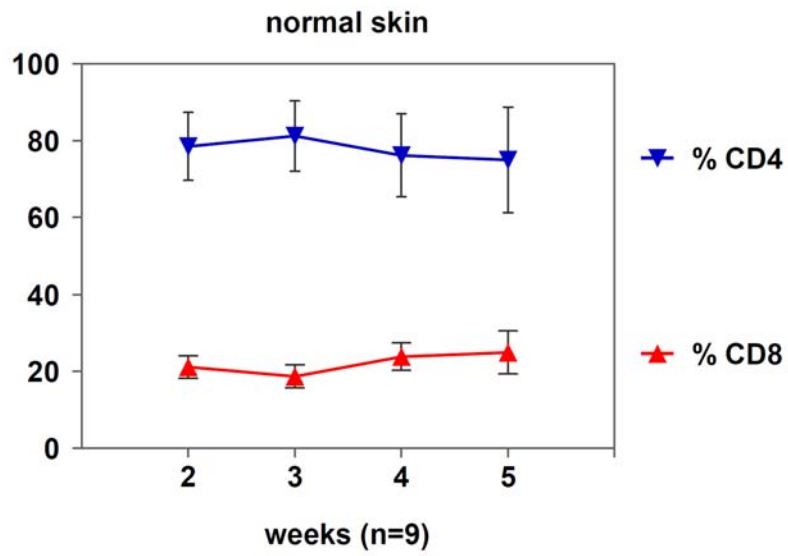

**Figure S5.** The percentages of CD4<sup>+</sup> and CD8<sup>+</sup> T cells isolated from normal skin biopsies are stable during five weeks *ex vivo* culture.
